# Supplementary material for: Facile RAFT synthesis of side-chain amino acids containing pH-responsive hyperbranched and star architectures
Source: Royal Society of Chemistry journal article supplement (doi:10.1039/c4py00766b), 2014-07-21
Supplement: c4py00766b1.pdf [file c4py00766b1.pdf]

## Supporting Information for

### Facile RAFT synthesis of side-chain amino acid containing pH responsive hyperbranched and star architectures

Saswati Ghosh Roy and Priyadarsi De\*

Polymer Research Centre, Department of Chemical Sciences, Indian Institute of Science  
Education and Research Kolkata, Mohanpur - 741246, Nadia, West Bengal, India

\* Corresponding Author: e-mail: p\_de@iiserkol.ac.in (P.D.).

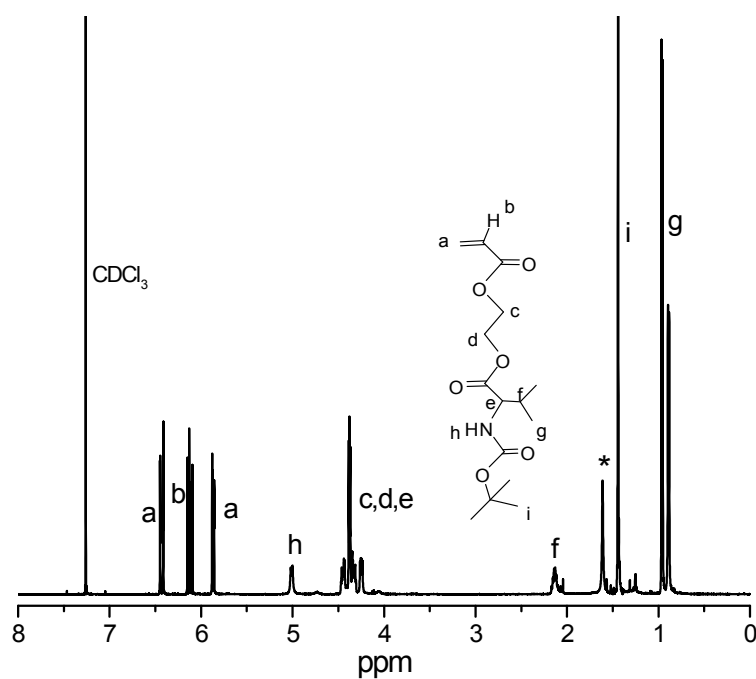

**Fig. S1**  $^1\text{H}$  NMR spectrum of Boc-Val-HEA in  $\text{CDCl}_3$ .

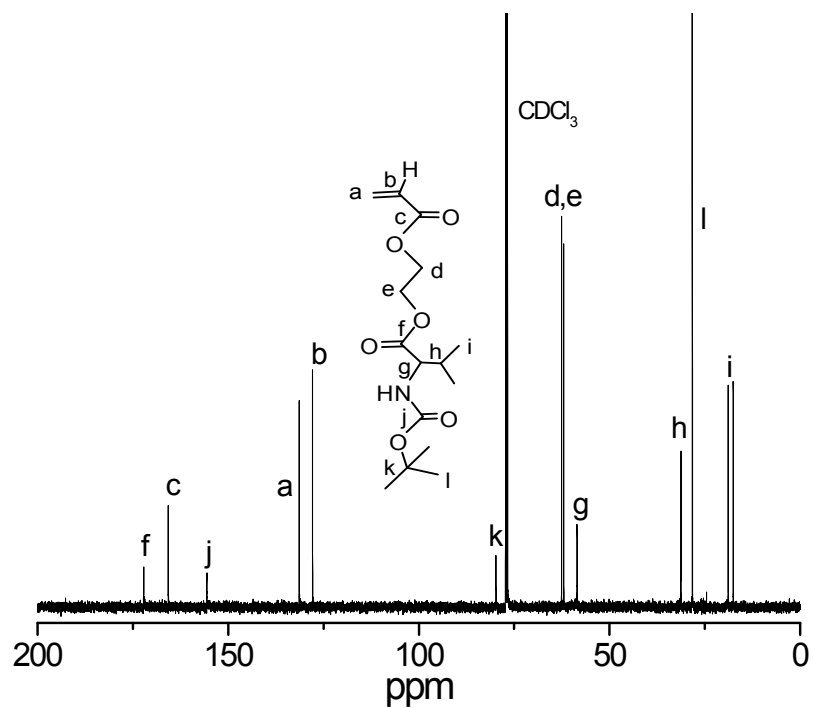

**Fig. S2**  $^{13}\text{C}$  NMR spectrum of Boc-Val-HEA in  $\text{CDCl}_3$ .

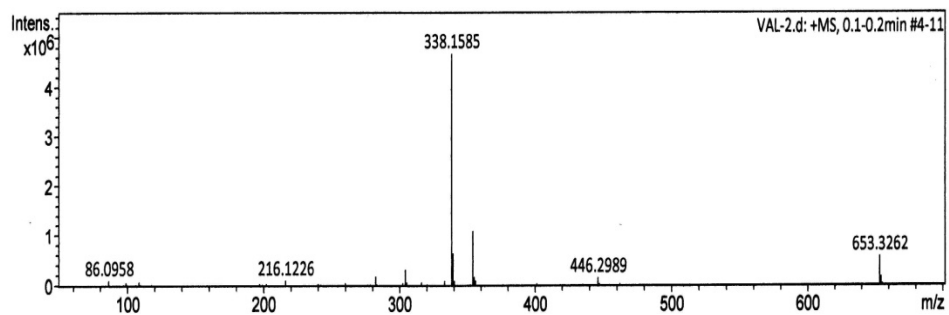

**Fig. S3** ESI-MS spectrum of Boc-Val-HEA.

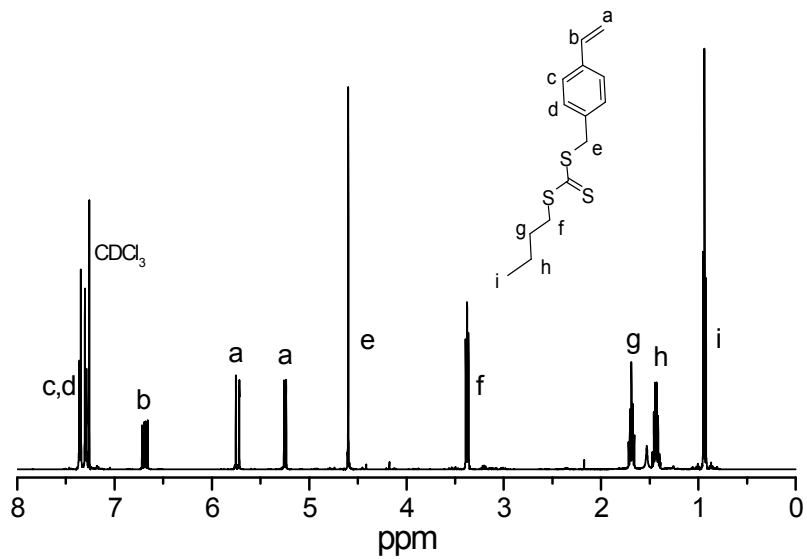

**Fig. S4**  $^1\text{H}$  NMR spectrum of VBBT CTA in  $\text{CDCl}_3$ .

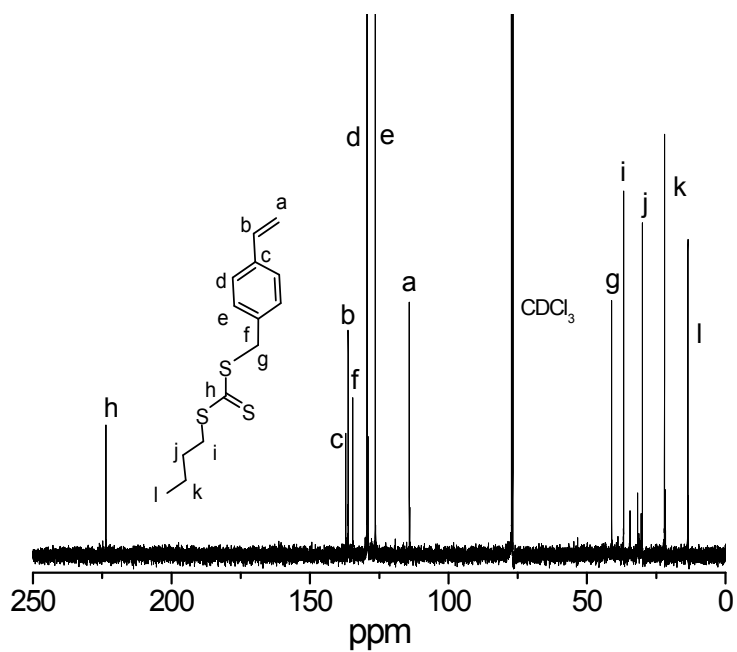

**Fig. S5**  $^{13}\text{C}$  NMR spectrum of VBBT CTA in  $\text{CDCl}_3$ .

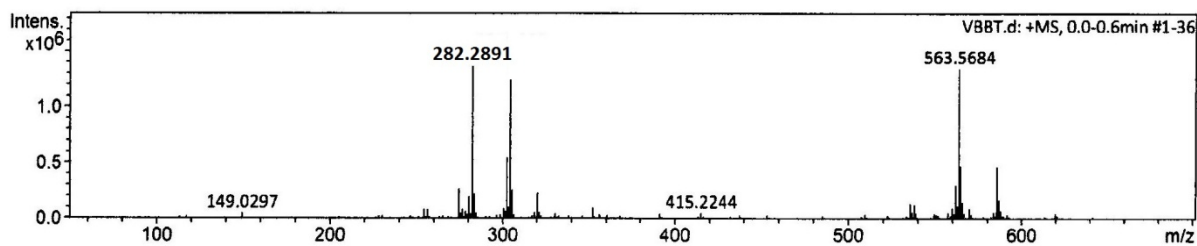

**Fig. S6** ESI-MS spectrum of VBBT.

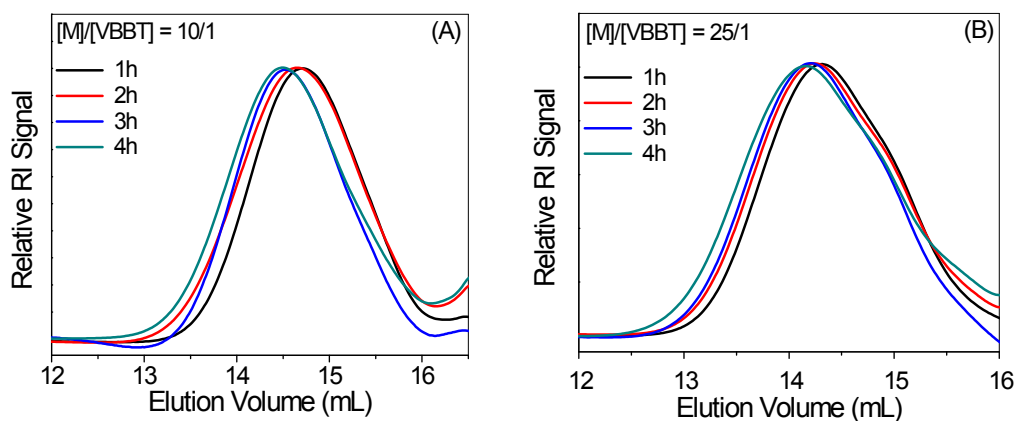

**Fig. S7** GPC-RI traces of the polymers prepared by SCVP-RAFT of Boc-Val-HEA with VBBT as function of time at  $[\text{Boc-Val-HEA}]/[\text{VBBT}] = 10/1$  (A) and  $25/1$  (B).

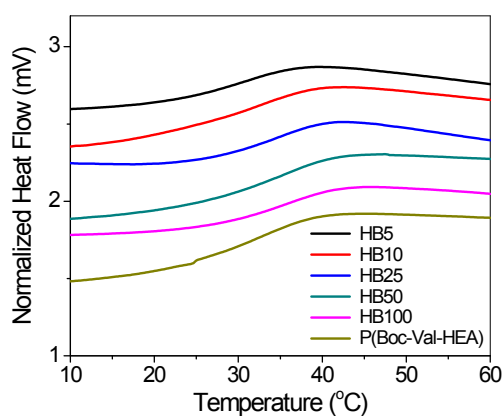

**Fig. S8** DSC thermograms of P(Boc-Val-HEA) homopolymer and hyperbranched copolymers P(Boc-Val-HEA-*co*-VBBT) with the different feed ratios.

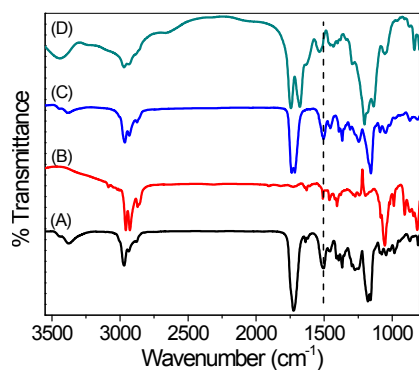

**Fig. S9** FT-IR spectra of (A) Boc-Val-HEA (B) VBBT CTA (C) HB5, and (D) DHB5.

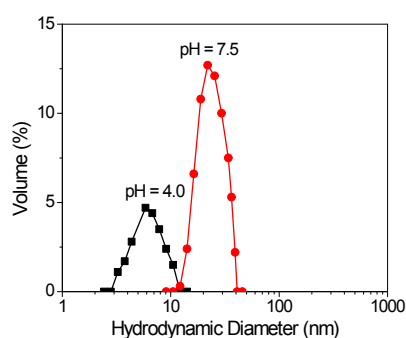

**Fig. S10** Size distribution detected by DLS with the solution of  $0.1 \text{ mg mL}^{-1}$  at different pH for P(DHB5-*star*-PEGMA).

**Thermo-responsive property of P(DHB10-*star*-MEO<sub>2</sub>MA) and P(DHB25-*star*-MEO<sub>2</sub>MA) stars:** Thermoresponsive property of P(DHB10-*star*-MEO<sub>2</sub>MA) and P(DHB25-*star*-MEO<sub>2</sub>MA) star polymers has been investigated by UV-Vis spectroscopy by analyzing their aqueous solution ( $2 \text{ mg/mL}$ ) as a function of temperature. Initially, the pH of the solution was adjusted to  $\text{pH} = 7.5$  and temperature of the solution was set to  $16 \text{ }^\circ\text{C}$ . Then, temperature of the solution was increased at  $2 \text{ }^\circ\text{C}$  intervals, allowed to equilibrate at that temperature for 6 min followed by the measurement of % transmittance (%*T*) at 500 nm. Reduction of 50% *T* of polymer solution was considered as lower critical solution temperature (LCST) of the polymer (Figure S11).

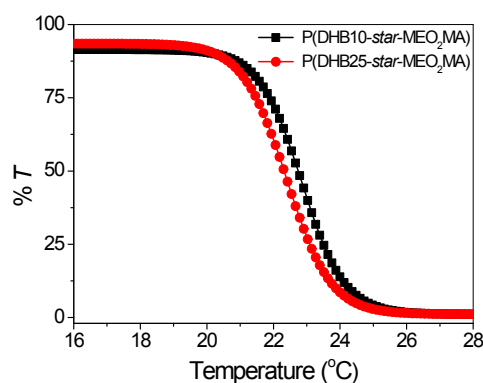

**Fig. S11** Plot of % transmittance at 500 nm *versus* temperature for the aqueous solutions (2 mg/mL) of P(DHB10-*star*-MEO<sub>2</sub>MA) and P(DHB25-*star*-MEO<sub>2</sub>MA) star polymers.

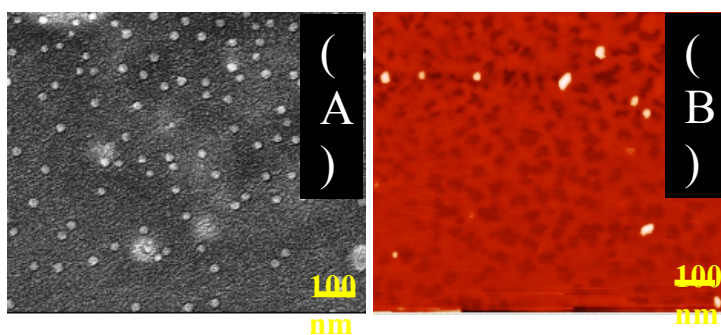

**Fig. S12** (A) SEM and (B) AFM images of P(DHB5-*star*-PEGMA). Samples were prepared from 0.1 mg mL<sup>-1</sup> polymer solutions in DI water at pH = 7.5 and 16 °C.

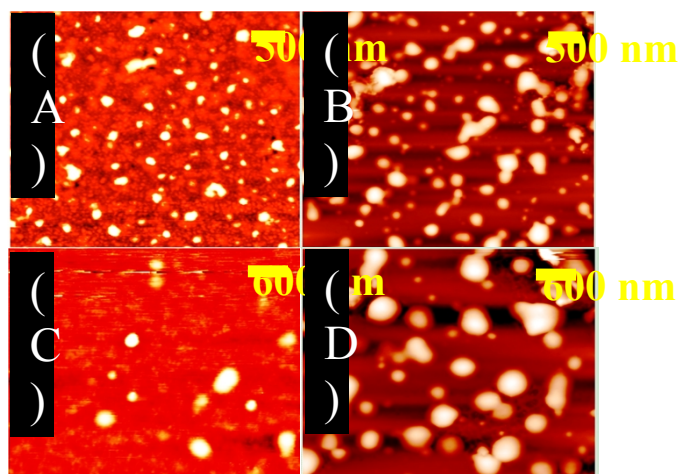

**Fig. S13** AFM images of (A) P(DHB10-*star*-MEO<sub>2</sub>MA) at pH = 7.5 and 16 °C (B) P(DHB10-*star*-MEO<sub>2</sub>MA) at pH = 7.5 and 26 °C (C) P(DHB25-*star*-MEO<sub>2</sub>MA) at pH = 7.5 and 16 °C, and (D) P(DHB25-*star*-MEO<sub>2</sub>MA) at pH = 7.5 and 26 °C. AFM samples were prepared from 0.1 mg mL<sup>-1</sup> polymer solutions.
